# Supplementary material for: Untangling the biological effects of cerium oxide nanoparticles: the role of surface valence states
Source: PubMed Central journal article supplement (PMC4615008; doi:10.1038/srep15613), 2015-10-22
Supplement: srep15613-s1.pdf [file srep15613-s1.pdf]

# Untangling the biological effects of cerium oxide nanoparticles: the role of surface valence states

## List of Authors

Author nº: 1

Name: Gerardo Pulido-Reyes

Institution: Departamento de Biología, Facultad de Ciencias, Universidad Autónoma de Madrid, E-28049, Spain

Email: [gerardo.pulido@uam.es](mailto:gerardo.pulido@uam.es)

Author nº: 2

Name: Ismael Rodea-Palomares

Institution: Departamento de Biología, Facultad de Ciencias, Universidad Autónoma de Madrid, E-28049, Spain

Email: [ismael.rodea@uam.es](mailto:ismael.rodea@uam.es)

Author nº: 3

Name: Soumen Das

Institution: Advance Material Processing Analysis Center and Nanoscience Technology Center, University of Central Florida, Florida 32826, United States

Email: [soumen.das@ucf.edu](mailto:soumen.das@ucf.edu)

Author nº: 4

Name: Tamil Selvan Sakthivel

Institution: Advance Material Processing Analysis Center and Nanoscience Technology Center, University of Central Florida, Florida 32826, United States

Email: [tselvan06@gmail.com](mailto:tselvan06@gmail.com)

Author nº: 5

Name: Francisco Leganes

Institution: Departamento de Biología, Facultad de Ciencias, Universidad Autónoma de Madrid, E-28049, Spain

Email: [francisco.leganes@uam.es](mailto:francisco.leganes@uam.es)

Author nº: 6

Name: Roberto Rosal

Institution: Departamento de Ingeniería Química, Universidad de Alcalá, E-28871, Alcalá de Henares, Madrid, Spain

Email: [roberto.rosal@uah.es](mailto:roberto.rosal@uah.es)

Author nº: 7

Name: Sudipta Seal

Institution: Advance Material Processing Analysis Center and Nanoscience Technology Center, University of Central Florida, Florida 32826, United States // Material Science and Engineering, Collage of Medicine, University of Central Florida, Florida 32826, USA

Email: [sudipta.seal@ucf.edu](mailto:sudipta.seal@ucf.edu)

Author nº: 8 (Submitting Author)

Name: Francisca Fernández-Piñas

Institution: Departamento de Biología, Facultad de Ciencias, Universidad Autónoma de Madrid, E-28049, Spain

Email: [francisca.pina@uam.es](mailto:francisca.pina@uam.es)

**Supplementary Table S1.-** Spontaneous cerium dissolution in the exposure media for all CNPs was tested by performing ICP-MS analyses of ultrafiltrated samples (10 mg/l).

| <b>Sample</b> | <b>Concentration<br/>(mg/l)</b> | <b>Stand. Dev</b> |
|---------------|---------------------------------|-------------------|
| CNP1          | 0,00045                         | 4.13%             |
| CNP2          | 0,00001                         | 29.22%            |
| CNP3          | 0,00081                         | 8.95%             |
| CNP4          | 0,00003                         | 4.05%             |
| CNP5          | n.d.*                           | -                 |
| CNP6          | n.d.*                           | -                 |
| CNP7          | n.d.*                           | -                 |

\*No detected

**Supplementary Figure S1.-** Effect of free ion  $Ce^{3+}$  on growth of *P. subcapitata*.

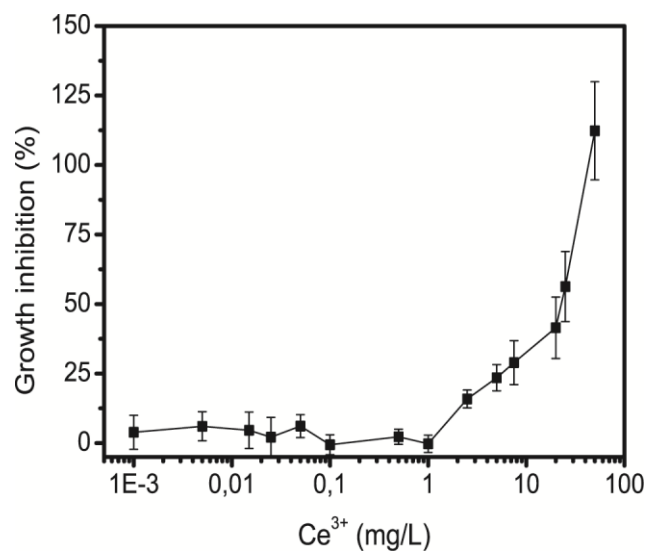

**Supplementary Table S2.-** Summary table of correlation analyses between algal growth inhibition and different tested factors, showing the adjusted  $R^2$  values and their associated  $p$ -values (ANOVA,  $F < P$ ).  $\alpha = 0.05$  is established as significance criterion (marked by asterisks).

| <b>Tested factors</b>    | <b><math>R^2</math></b> | <b><math>p</math>-value</b> |
|--------------------------|-------------------------|-----------------------------|
| Surface $\text{Ce}^{3+}$ | 0.706                   | 0.047*                      |
| $\zeta$ -Potential       | 0.693                   | 0.049*                      |
| Nominal Size             | 0.007                   | 0.384                       |
| Effective Size           | 0.152                   | 0.281                       |

**Supplementary Figure S2.** Box plots which show agal growth inhibition as function of nanoparticle shape (cube: CNP4, rod: CNP3 and sphere: CNP1, CNP2 and CNP5; Figure S2a) and just as function of spheric-shaped nanoceria (CNP1, CNP2 and CNP5; Figure S2b). A one way ANOVA coupled with Tukey's HSD (honestly significant difference) post-hoc test was performed for comparison of means. Statistically significant differences ( $\alpha = 0.05$ ) are marked by asterisks.

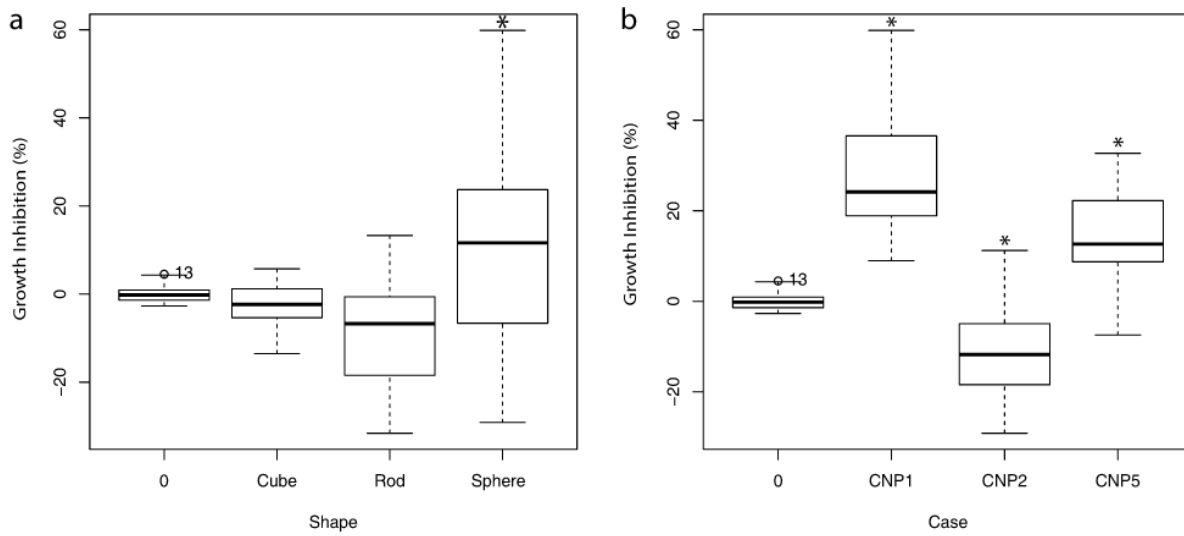

**Supplementary Table S3.-**  $\zeta$ -potential and effective diameter of CNP1 and CNP2 with the addition of Fe or phosphate.

| 10 mgL <sup>-1</sup> OECD medium |                         |                         |       |                         |                         |      |
|----------------------------------|-------------------------|-------------------------|-------|-------------------------|-------------------------|------|
| Sample Name                      | 0.1 mM Fe               |                         |       | 0.2 mM Phosphate        |                         |      |
|                                  | $\zeta$ -potential (mV) | Effective Diameter (nm) | PDI*  | $\zeta$ -potential (mV) | Effective Diameter (nm) | PDI* |
| CNP1                             | 10.15 ±                 | 787.3                   | 0.979 | -19.90 ±                | 817.2                   | 0.52 |
|                                  | 0.889                   |                         |       | 0.557                   |                         | 6    |
| CNP2                             | -15.30 ±                | 1073                    | 0.362 | -10.14 ±                | 450.7                   | 0.57 |
|                                  | 1.9                     |                         |       | 1.06                    |                         | 3    |

\*PDI=Polydispersity index

**Supplementary Figure S3.-** Detection of H<sub>2</sub>O<sub>2</sub> using the Amplex® Red Hydrogen Peroxide/Peroxidase Assay Kit. Reactions containing 50 μM Amplex® Red reagent, 0.1 U/mL HRP and the indicated amount of CNP1 (a) or H<sub>2</sub>O<sub>2</sub> as standard curve (b) were incubated for 30 minutes at room temperature. The fluorescence (excitation 535 nm, emission 595 nm) was measured on a Fluorostar Omega plate reader (BMG LABTECH GmbH, Germany). Background fluorescence, determined for a control reaction (H<sub>2</sub>O), has been subtracted from each value.

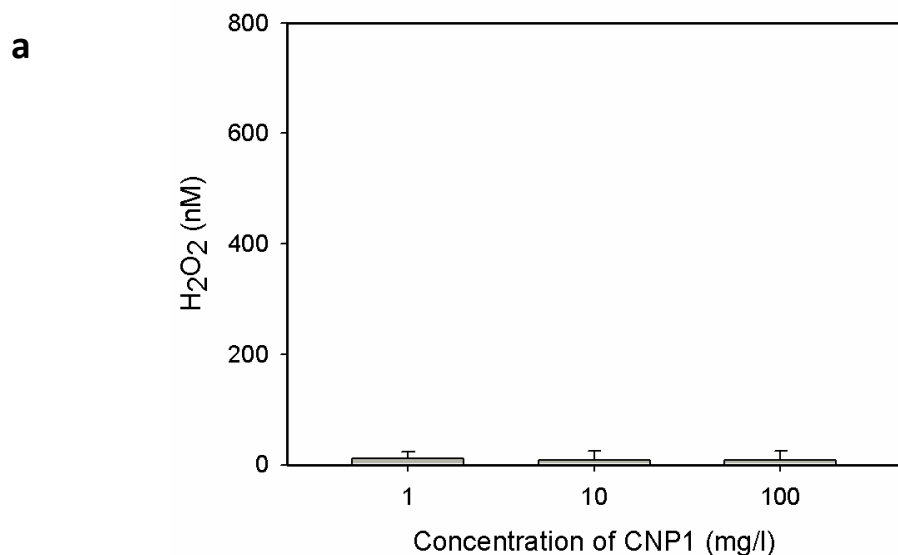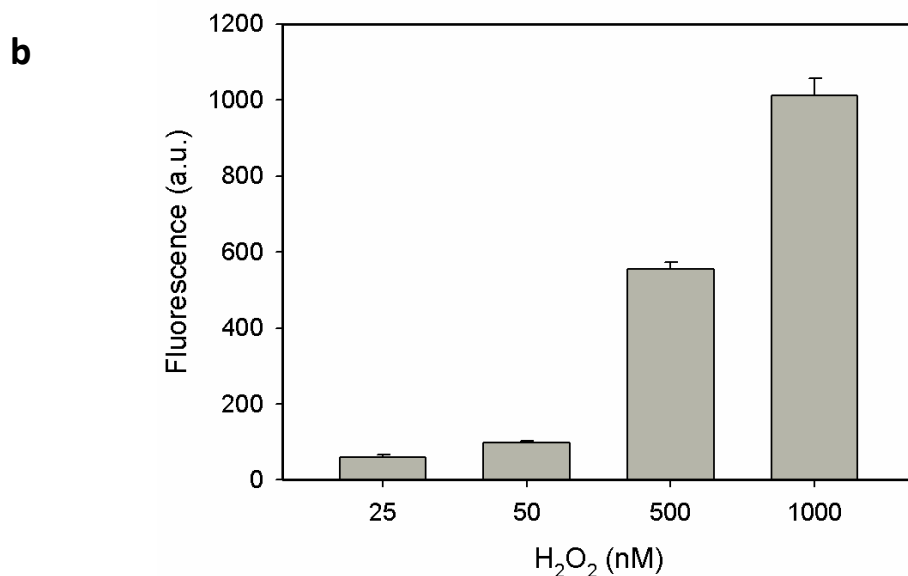

**Supplementary Table S4.-** Composition of the OECD TG 201 medium.

| Component                                             | OECD    |            |
|-------------------------------------------------------|---------|------------|
|                                                       | mg/L    | mM         |
| NaHCO <sub>3</sub>                                    | 50.0    | 0.595      |
| NaNO <sub>3</sub>                                     |         |            |
| NH <sub>4</sub> Cl                                    | 15.0    | 0.280      |
| MgCl <sub>2</sub> ·6(H <sub>2</sub> O)                | 12.0    | 0.0590     |
| CaCl <sub>2</sub> ·2(H <sub>2</sub> O)                | 18.0    | 0.122      |
| MgSO <sub>4</sub> ·7(H <sub>2</sub> O)                | 15.0    | 0.0609     |
| K <sub>2</sub> HPO <sub>4</sub>                       |         |            |
| KH <sub>2</sub> PO <sub>4</sub>                       | 1.60    | 0.00919    |
| FeCl <sub>3</sub> ·6(H <sub>2</sub> O)                | 0.0640  | 0.000237   |
| Na <sub>2</sub> EDTA·2(H <sub>2</sub> O)              | 0.100   | 0.000269   |
| H <sub>3</sub> BO <sub>3</sub>                        | 0.185   | 0.00299    |
| MnCl <sub>2</sub> ·4(H <sub>2</sub> O)                | 0.415   | 0.00210    |
| ZnCl <sub>2</sub>                                     | 0.00300 | 0.0000220  |
| CoCl <sub>2</sub> ·6(H <sub>2</sub> O)                | 0.00150 | 0.00000630 |
| Na <sub>2</sub> MoO <sub>4</sub> ·2(H <sub>2</sub> O) | 0.00700 | 0.0000289  |
| CuCl <sub>2</sub> ·2(H <sub>2</sub> O)                | 0.00001 | 0.00000006 |
